# Supplementary material
Source: PubMed Central journal article supplement (PMC3314129)
Supplement: NIHMS360660-supplement-1_si_001.pdf [file NIHMS360660-supplement-1_si_001.pdf]

**Supporting Information for “Marburg Virus Glycoprotein GP2: pH-Dependent Stability of the Ectodomain  $\alpha$ -Helical Bundle”**

*Joseph S. Harrison,<sup>‡</sup> Jayne F. Koellhoffer,<sup>‡</sup> Kartik Chandran,<sup>§</sup> and Jonathan R. Lai<sup>‡,\*</sup>*

<sup>‡</sup>Department of Biochemistry, and <sup>§</sup>Department of Microbiology and Immunology, Albert Einstein College of Medicine, 1300 Morris Park Avenue, Bronx, NY 1046

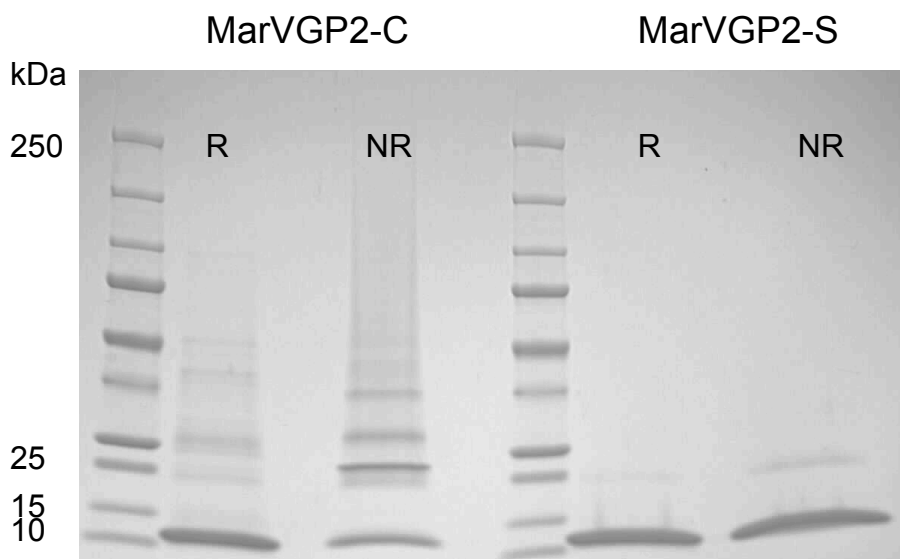

**Figure S1 SDS-PAGE analysis of MarVGP2-C and MarVGP2-S under reducing (R) and non-reducing (NR) conditions.** Higher-order oligomers were observed in MarVGP2-C sample, likely due to disulfide bonding with the unpaired C556 between individual chains .
